# Supplementary material for: Toxin secretion and trafficking by Mycobacterium tuberculosis
Source: PubMed Central journal article supplement (PMC8593097; doi:10.1038/s41467-021-26925-1), 2021-11-15
Supplement: 41467_2021_26925_MOESM1_ESM.pdf [file 41467_2021_26925_MOESM1_ESM.pdf]

## SUPPLEMENTARY INFORMATION

### Toxin secretion and trafficking by *Mycobacterium tuberculosis*

David Pajuelo<sup>a</sup>, Uday Tak<sup>a,&</sup>, Lei Zhang<sup>a</sup>, Olga Danilchanka<sup>a,\$</sup>, Anna D. Tischler<sup>b</sup>  
and Michael Niederweis<sup>a\*</sup>

<sup>a</sup> Department of Microbiology, University of Alabama at Birmingham, 609 Bevell Biomedical Research Building, 845 19th Street South, Birmingham, AL 35294, USA

<sup>b</sup> Department of Microbiology and Immunology, University of Minnesota Twin Cities, Minneapolis, Minnesota, MN 55455, USA

<sup>&</sup> Current address: University of Colorado Boulder, Jennie Smoly Caruthers Biotechnology Building B255, 3415 Colorado Avenue, Boulder, Colorado 80303.

<sup>\$</sup> Current address: Merck & Co., Inc., Cambridge, MA 02141, USA

**\* For correspondence:**

E-Mail: [mnieder@uab.edu](mailto:mnieder@uab.edu)

Phone: +1-205-975-4390

## Supplementary Figures

a

>*M. tuberculosis* H37Rv|Rv3903c: 846 aa

MAPLAVDPAALDSAGGAVVAAGAGLGAVISSLTAALAGCAGMAGDDPAGAVFGRSYDGSAAALVQAMSVARNGLCNLGDGVRMSAHN**YSLAE**AMSDVAGRAAPLPAPPPSGCVGVGAPPSAVGGGGGAPKGGWGWVAPYIGMIWPNGDSTKLRAAAVAWRSAGTQFALTEIQSTAGPMGVI RAQQLPEAGLIESAFADAYASTTAVVGQCHQLAAQLDAYAARIDAVHAAVLDLLARICDPLTGIKEVWEFLTDQDEDEIQRIAHDIAVVVDQFSGEVDALAAEITAVVSHAEAVITAMADHAGKQWDRFLHSNPVGVVIDGTGQQKLGFGEEAFGMAKDSWDLGPLRASIDPFGW**YRSWE**EMLTGMAPLAGLGGENAPGVVESWKQFGKSLIHWDEWTTNPNEALGKTVFDAATLALPGGPLSKLGSKGRDILAGVRGLKERLEPTTPHLEPPATPPRPGPQPPRIEPPESGHPAPAPAAKPAPVPANGPLPHSPTESKPPVDRPAEPVAPSSASAGQPRVSAATTPGTHVPHGLPQPG EHVPAQAPPATLLGGPPVESAPATAHQPPQWATTPAAPAAAPHSTPGGVHSTESGPHGRSLSAHGSEPTHDGASHGSGHSGSEPPGLHAPHREQQLAMHSNEPAGEGWH**RLSDEAVDPQ**YGEPLSRHWDFTDNPADRSRINPVVAQLMEDPNAPFGRDPQGOPYTQERYQERFNSVGPW GQQYSNFPNNGAVPGTRIA**YTNLE**KFLSDYGPQLDRIGGDQGYLAIMEHGRPASWEQRALHVTSLRDPYHAYTIDWLP~~EGWFIEVSEVAPGCGQPGGSIQVRI~~FDHQNEMRKVEELIRRGVLRQ

Channel domain

NAD<sup>+</sup> Glycohydrolase domain

Putative ESX Motif

b

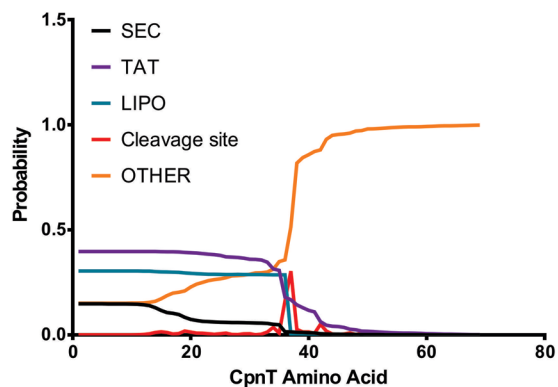

c

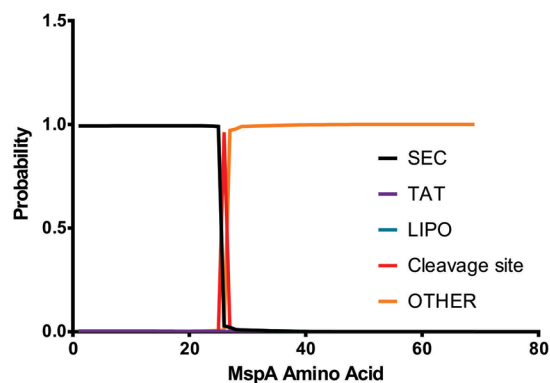

## Supplementary Figure 1. Bioinformatic analysis of CpnT.

a. Amino acid sequence of CpnT (Rv3903c) of *Mycobacterium tuberculosis*. Analysis of the N-terminal amino acid sequences of CpnT (b) and the *Mycobacterium smegmatis* porin A (MspA) (c), which has a verified SEC signal sequence, using the SignalP 5.0 server. SEC = general secretory pathway signal, TAT = twin arginine transport pathway, LIPO = lipoprotein, Other = probability of having no known signal peptide.

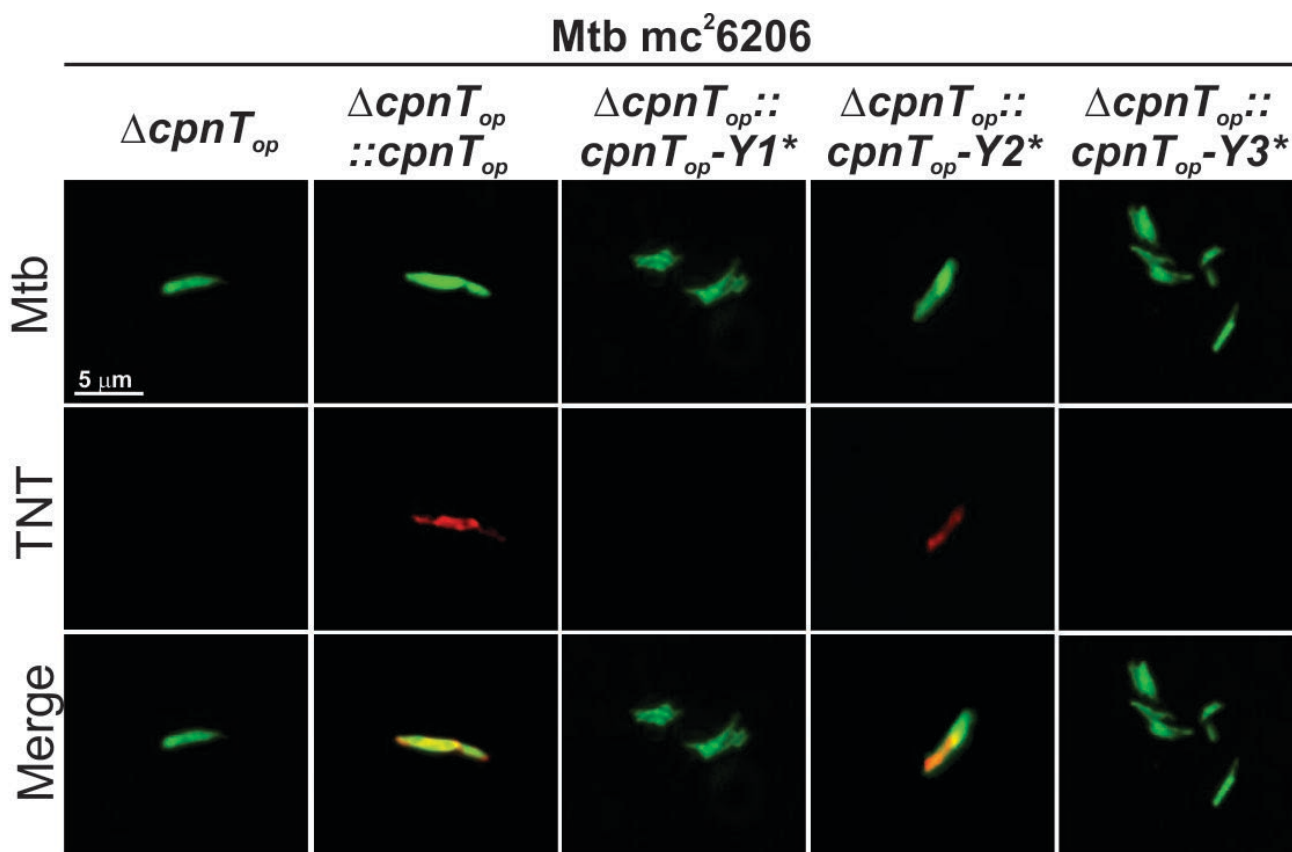

**Supplementary Figure 2. The ESX Y1 and Y3 motifs are required for surface accessibility of CpnT in *M. tuberculosis*.**

Full data set for Figure 1c with each fluorescence channel shown separately. The indicated Mtb strains were labeled with the metabolic dye DMN-Trehalose (green) and surface-exposed CpnT was detected using an anti-TNT and Alexa Fluor-594 antibodies (red). Shown are representative images from at least two independent experiments ( $n \geq 2$ ).

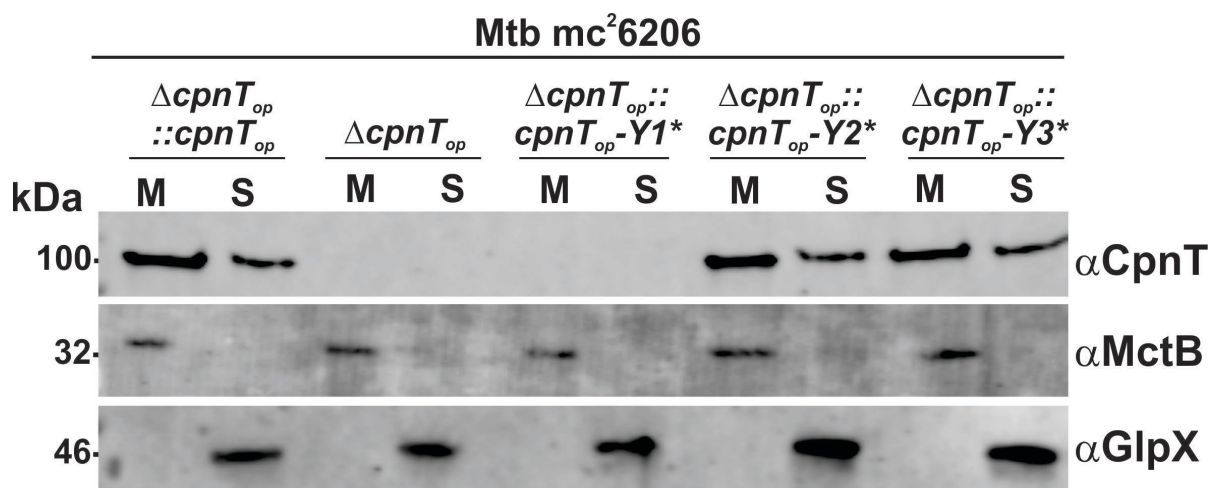

**Supplementary Figure 3. Subcellular localization of CpnT with ESX motif mutations in *M. tuberculosis*.**

The cell lysates of the indicated Mtb strains were separated in water-soluble (S) and membrane (M) fractions by ultracentrifugation. The  $\Delta cpnT_{op}$  strain was transformed with a plasmid encoding the wt CpnT operon (pML3009), the CpnT operon with the Y1\* mutation (pML3966), Y2\* mutation (pML3967) or the Y3\* mutation (pML3968). The localization of CpnT in these fractions was determined by immunoblots using an anti-TNT antibody and the proteins MctB (membrane; M) and GlpX (water-soluble; S) as markers, with their respective antibodies. Shown are representative blots from three independent experiments (n=3). Source data are provided in the Source Data file.

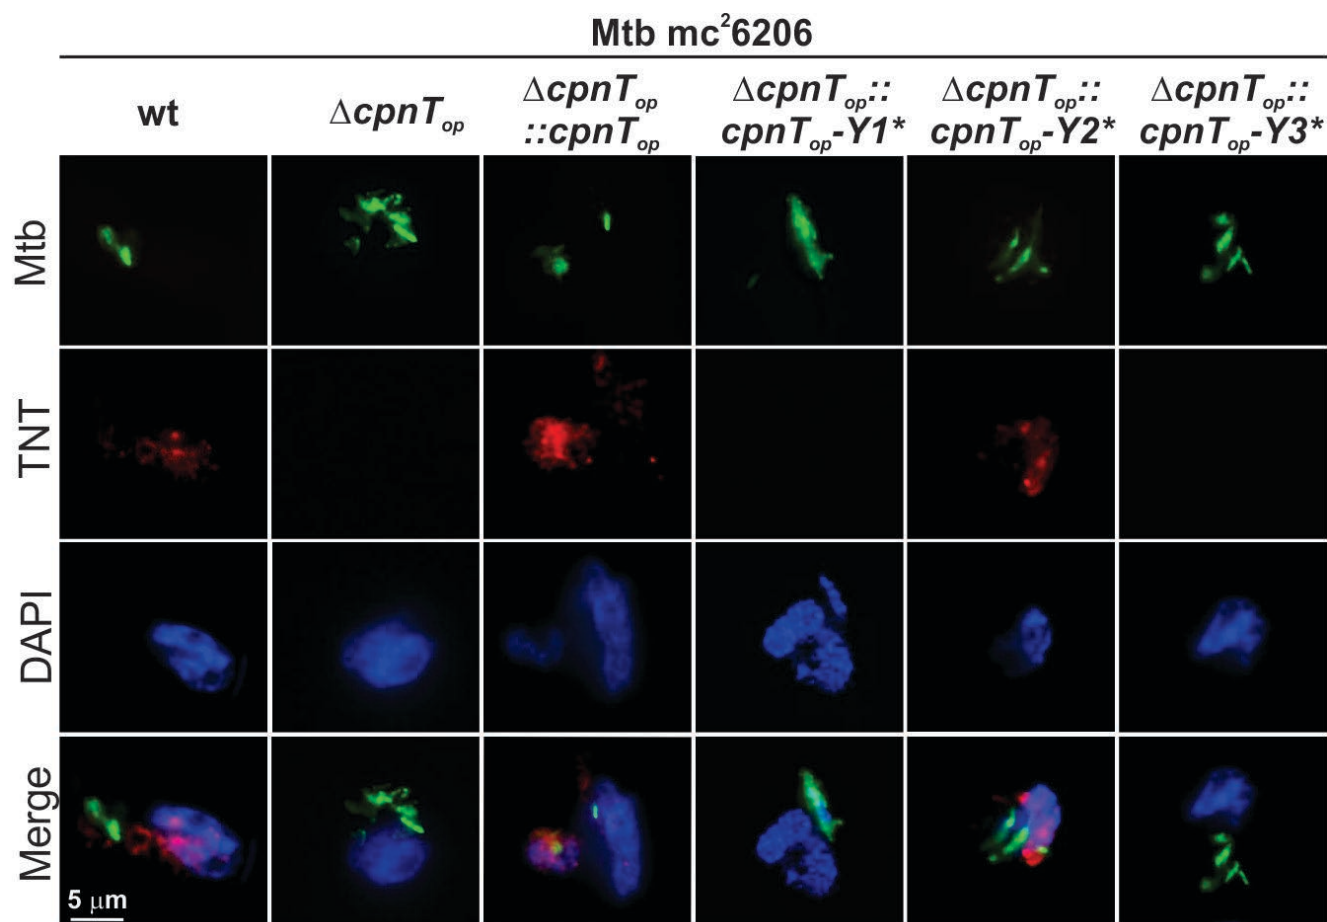

**Supplementary Figure 4. CpnT with mutated Y1 and Y3 ESX motifs does not reach the cytosol of macrophages infected with *M. tuberculosis*.**

Full data set for Figure 1e with each fluorescence channel shown separately. Secretion of TNT into the cytosol of Mtb-infected macrophages. The indicated Mtb strains were labelled with the metabolic dye DMN-Trehalose (green) and used to infect THP-1 macrophages at a MOI of 10:1. The macrophages were permeabilized with Triton X-100 48 h after infection, stained with an anti-TNT antibody and Alexa Fluor-594 secondary antibody (red). The macrophage nuclei were stained with DAPI. Shown are representative images from at least two independent experiments (n $\geq$ 2).

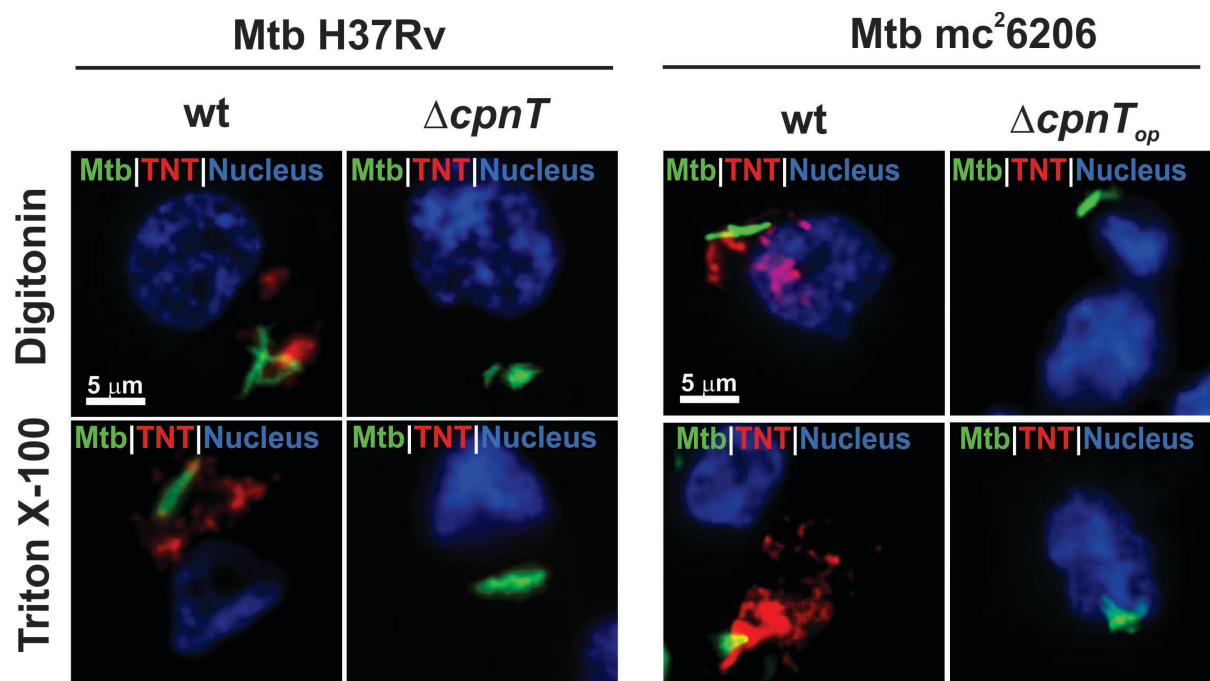

**Supplementary Figure 5. TNT secretion in macrophages infected with virulent Mtb H37Rv and avirulent Mtb mc<sup>2</sup>6206.**

The indicated Mtb strains were labelled with the metabolic dye DMN-Trehalose (green) and used to infect THP-1 macrophages at a MOI of 10:1. 48 h after infection, the macrophages were fixed with 4% paraformaldehyde (H37Rv 1h; mc<sup>2</sup>6206 10 min), then permeabilized with digitonin to enable access of antibodies to the cytoplasm, or with Triton X-100 for access to intracellular compartments. Then, cells were stained with an anti-TNT and with an Alexa Fluor-594 secondary antibody (red). The macrophage nuclei were stained with DAPI. Images were taken from Figure 4a (mc<sup>2</sup>6026) and Figure 4e (H37Rv). Shown are representative images from at least two independent experiments (n $\geq$ 2).

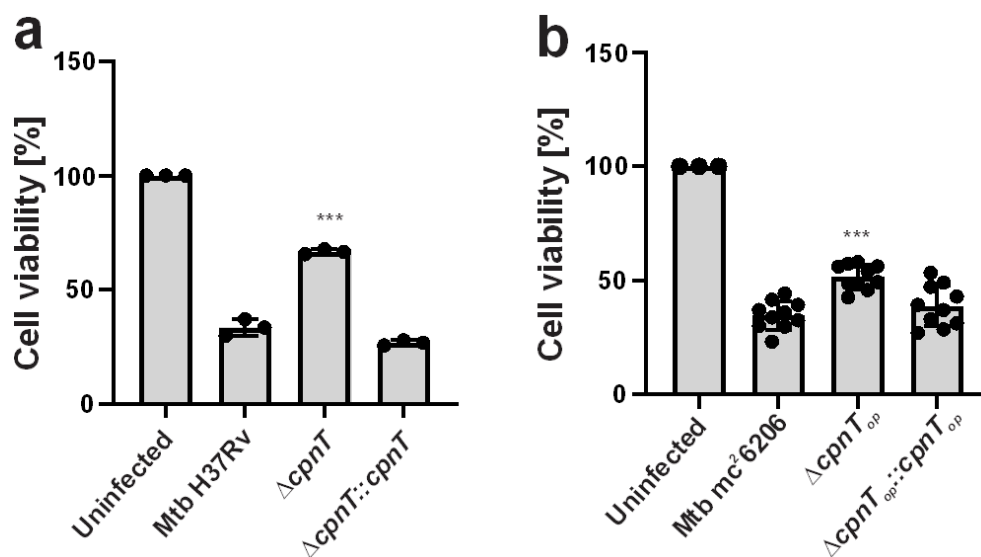

**Supplementary Figure 6. Cytotoxicity of virulent Mtb H37Rv and avirulent Mtb mc<sup>2</sup>6206 in infected macrophages.**

Cell viability of Mtb-infected macrophages was measured as the total ATP content with a luminescent ATP detection assay kit. Data are represented as mean  $\pm$  SEM. Asterisks indicate significant differences (p-value < 0.05, calculated using the One-way ANOVA with Dunnett's correction) compared with the virulent Mtb H37Rv (**a**) and the avirulent Mtb mc<sup>2</sup>6206 strain (**b**). The mc<sup>2</sup>6206 data were taken from Figure 4d. Data are represented as mean  $\pm$  SEM of at least two independent experiments (n $\geq$ 2). Source data are provided in the Source Data file.

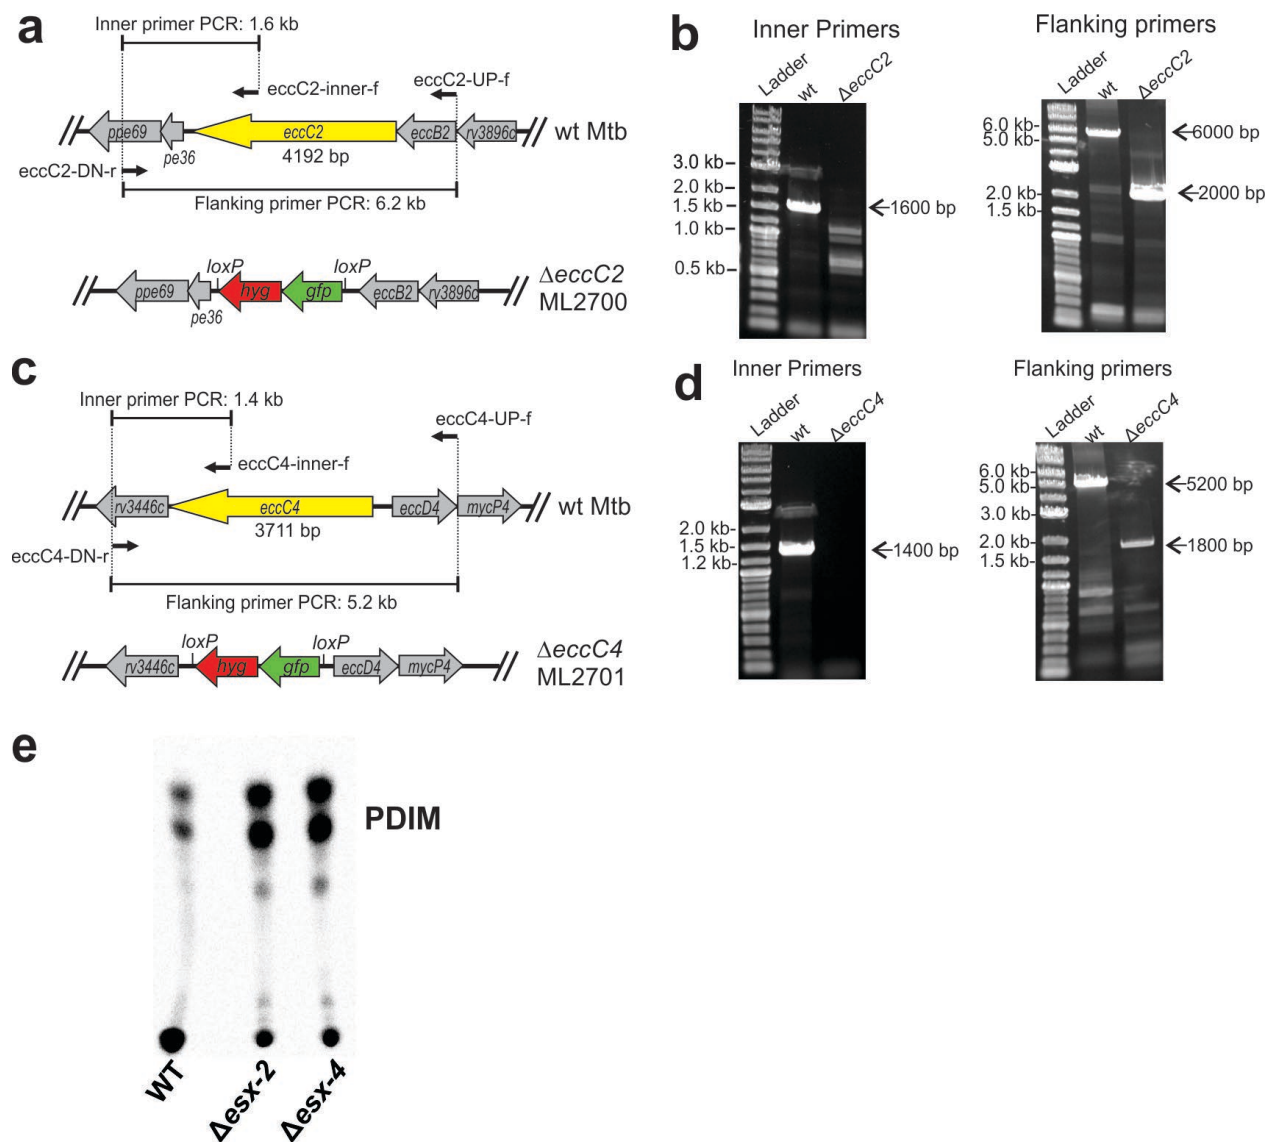

### Supplementary Figure 7. Construction and validation of the *M. tuberculosis* $\Delta eccC2$ and $\Delta eccC4$ strains.

**a.** Upstream and downstream regions of *eccC2* and binding sites for primers with the indicated PCR fragment size for each primer pair. **b.** PCR validation of the *eccC2* unmarked deletion mutant ML2691 (Supplementary Table 1) using inner and flanking primers (Supplementary Table 4). **c.** Upstream and downstream regions of *eccC4* and binding sites for primers with the indicated PCR fragment size for each primer pair. **d.** PCR validation of the *eccC4* unmarked deletion mutant ML2690 (Supplementary Table 1) using inner and flanking primers (Supplementary Table 4). **e.** Thin layer chromatography of total lipids extracted from  $^{14}\text{C}$ -propionate-labeled Mtb strains indicating the presence of the outer membrane lipid PDIM.



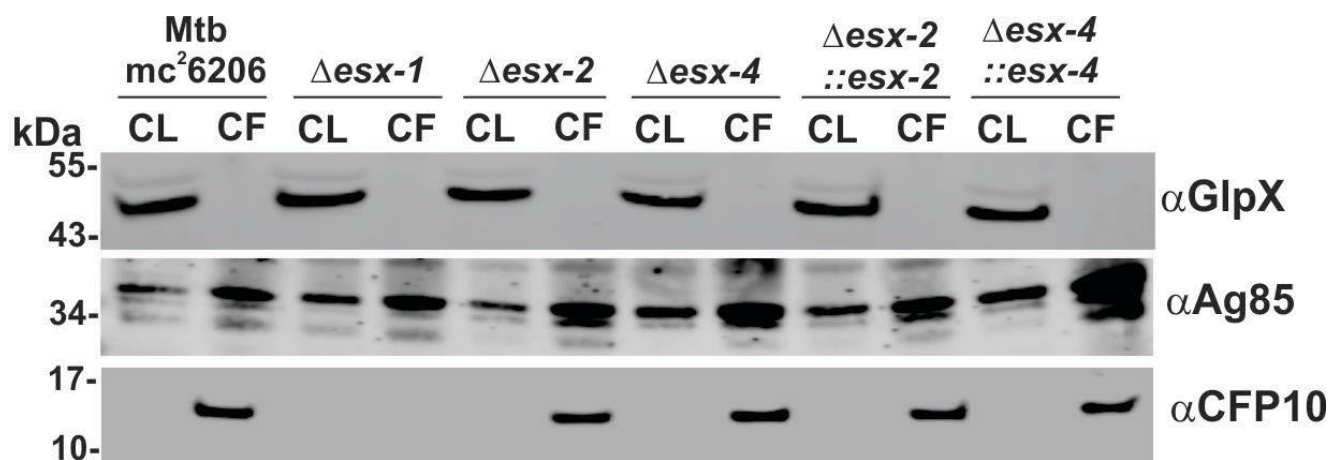

**Supplementary Figure 8. The activity of the ESX-1 system is not impaired in the *esx-2* and *esx-4* deletion mutants.**

The activity of the ESX-1 system was analyzed by detecting the secreted ESX-1 substrate CFP-10 in cellular fractions of Mtb. Proteins from the whole cell lysates (CL) and culture filtrates (CF) of the indicated Mtb strains were analyzed by immunoblotting to detect CFP-10 with specific antibodies. Antibodies against GlpX and Ag85 were used as controls for the whole cell lysate and culture filtrate fractions, respectively. The  $\Delta$ *esx-1* strain has a deletion of the RD1 region and lacks the *panCD* genes. Shown are representative blots from three independent experiments (n=3). Source data are provided in the Source Data file.

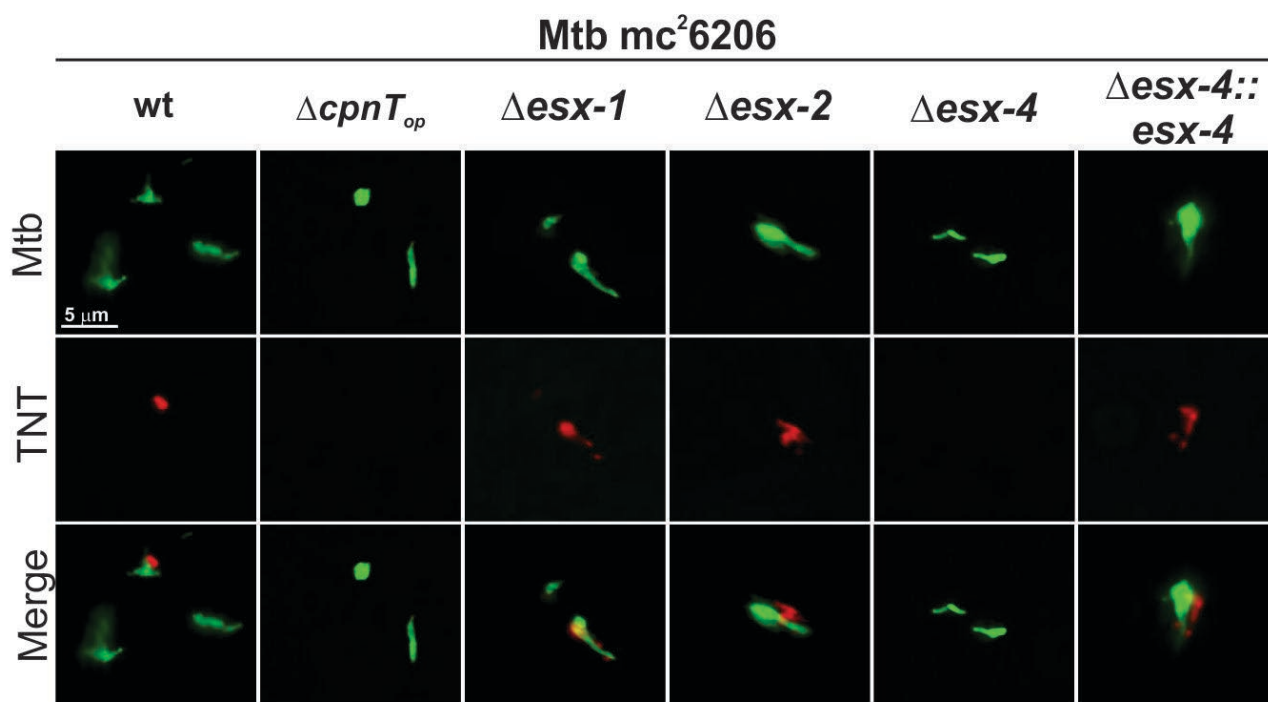

**Supplementary Figure 9. The ESX-4 system is required for CpnT export and surface accessibility in *M. tuberculosis*.**

Full data set for Figure 2a with each fluorescence channel shown separately. The indicated Mtb strains were labeled with the metabolic dye DMN-Trehalose (green) and surface-exposed CpnT was detected using an anti-TNT and Alexa Fluor-594 antibodies (red). The  $\Delta esx-1$  strain has a deletion of the RD1 region and lacks the *panCD* genes. Shown are representative images from at least two independent experiments ( $n \geq 2$ ).

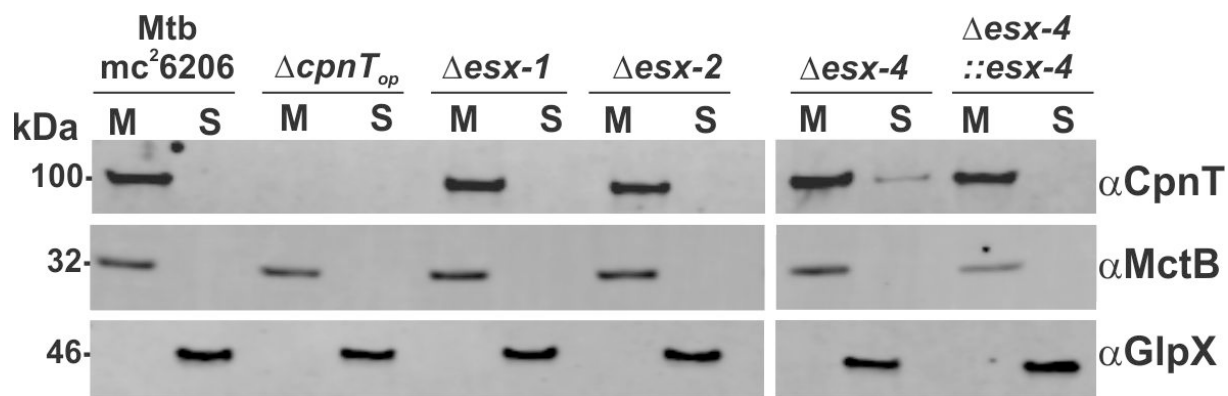

**Supplementary Figure 10. Subcellular localization of CpnT in the *esx-1*, *esx-2* and *esx-4* deficient *M. tuberculosis* strains.**

The cell lysates of the indicated Mtb strains were separated in membrane (M) and water-soluble (S) fractions by ultracentrifugation. The localization of CpnT in these fractions was determined by immunoblots using an anti-TNT antibody. The proteins MctB and GlpX were used as markers of the membrane and soluble fractions, respectively. The  $\Delta esx-1$  strain has a deletion of the RD1 region and lacks the *panCD* genes. Shown are representative blots from three independent experiments (n=3). Source data are provided in the Source Data file.

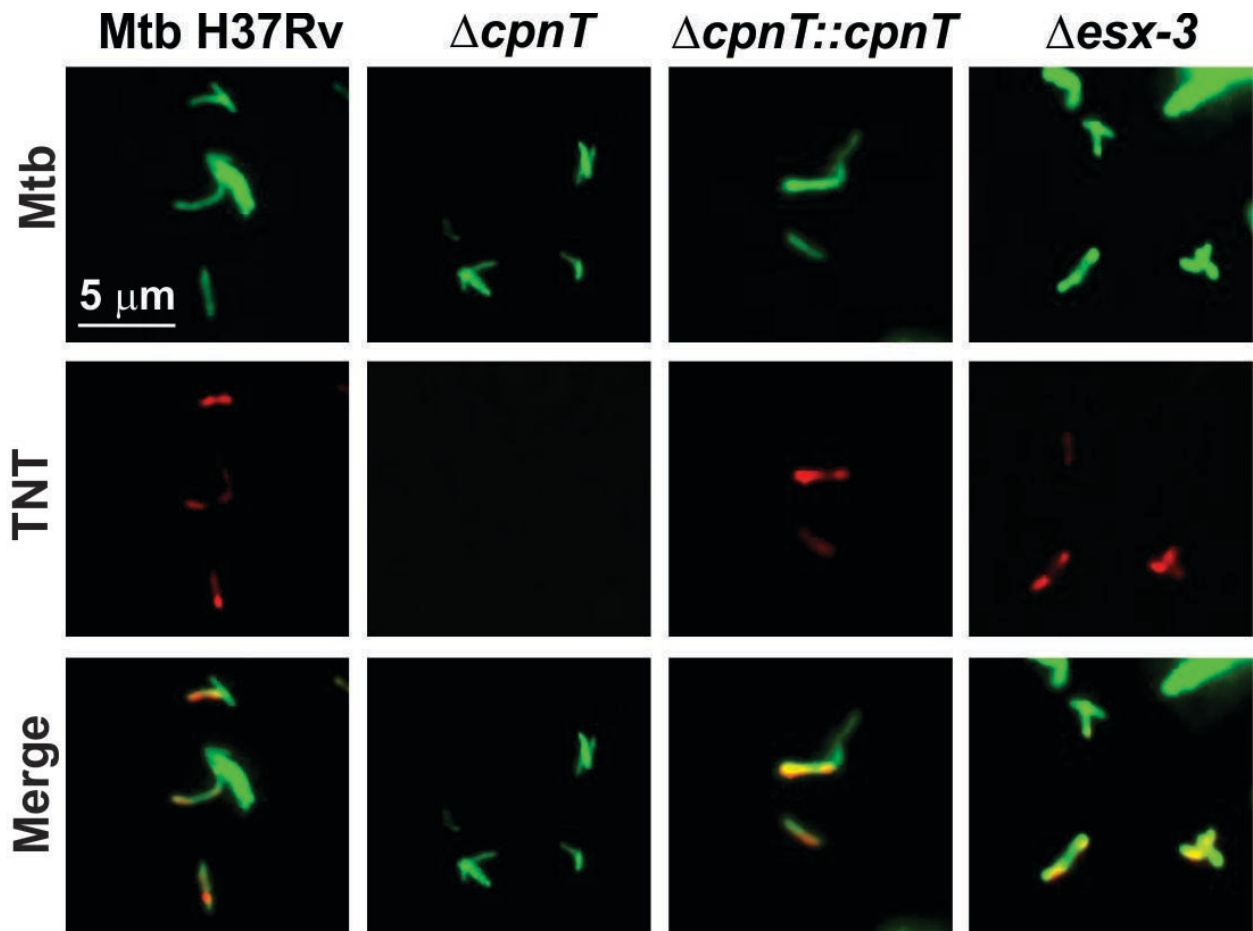

**Supplementary Figure 11. The ESX-3 system does not participate in CpnT export in *M. tuberculosis*.**

Full data set for Figure 2d with each fluorescence channel shown separately. The indicated *Mtb* strains were labeled with the metabolic dye DMN-Trehalose (green) and surface-exposed CpnT was detected using an anti-TNT and Alexa Fluor-594 antibodies (red). Shown are representative images from at least two independent experiments ( $n \geq 2$ ).

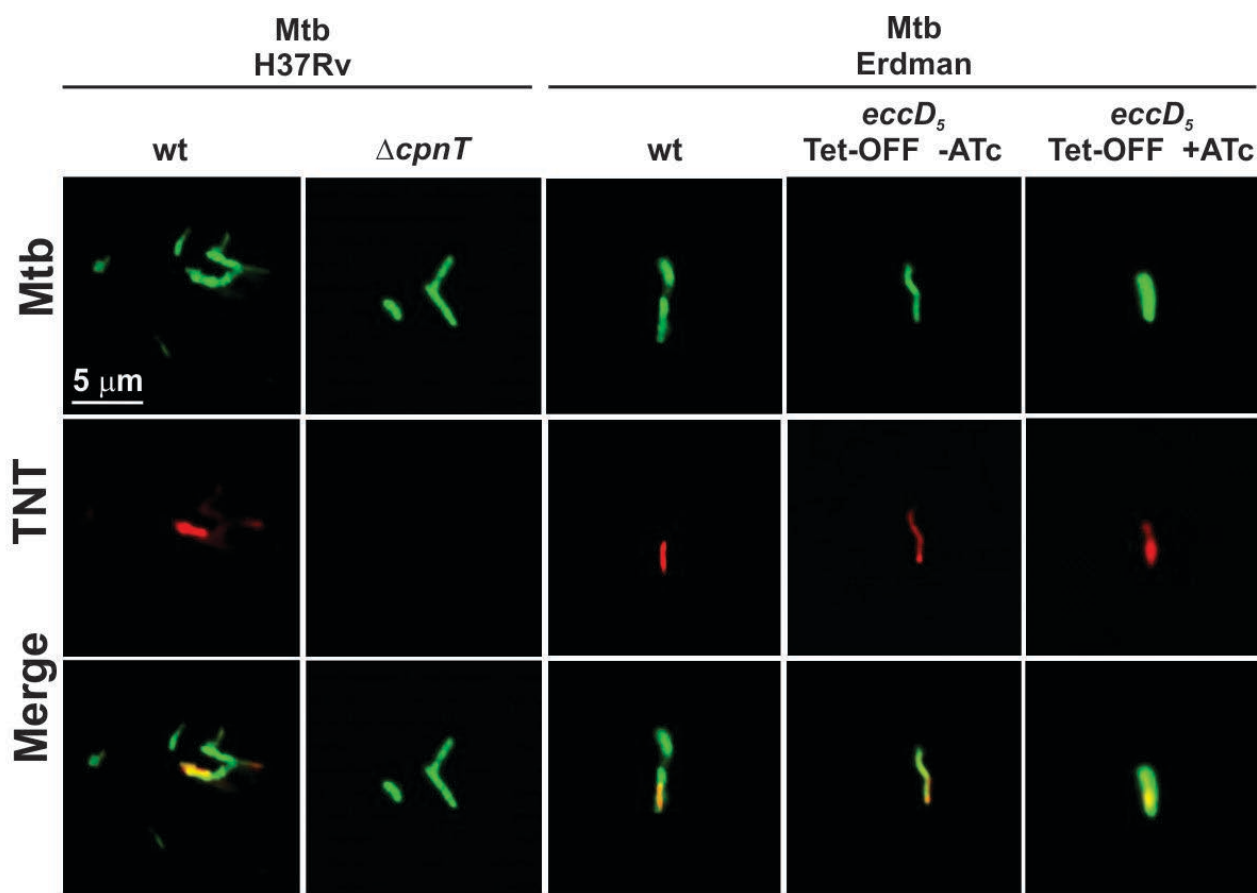

**Supplementary Figure 12. The ESX-5 system does not participate in CpnT export in *M. tuberculosis*.**

Full data set for Figure 2g with each fluorescence channel shown separately. The indicated Mtb strains were labeled with the metabolic dye DMN-Trehalose (green) and surface-exposed CpnT was detected using an anti-TNT and Alexa Fluor-594 antibodies (red). Shown are representative images from at least two independent experiments ( $n \geq 2$ ).

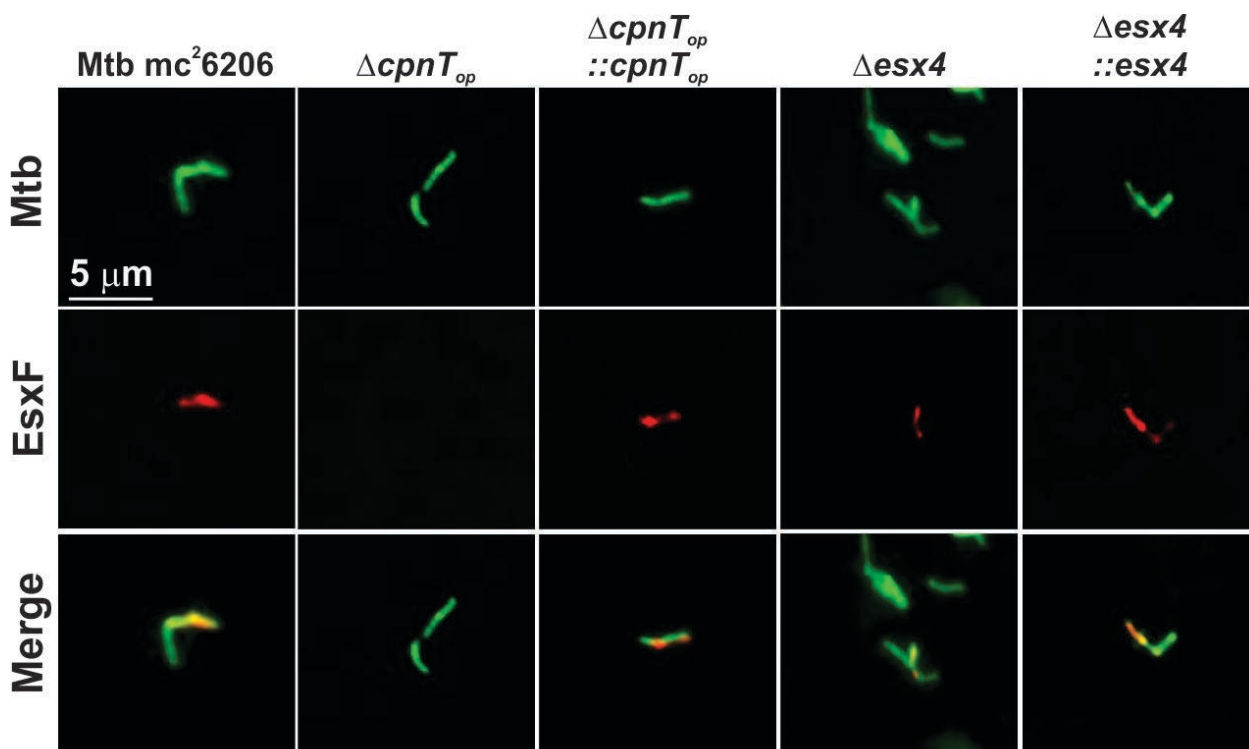

**Supplementary Figure 13. The ESX-4 system is involved in EsxF export in *M. tuberculosis*.**

Full data set for Figure 3a with each fluorescence channel shown separately. The indicated Mtb strains were labeled with the metabolic dye DMN-Trehalose (green) and surface-exposed CpnT was detected using an anti-TNT and Alexa Fluor-594 antibodies (red). Shown are representative images from three independent experiments (n=3).

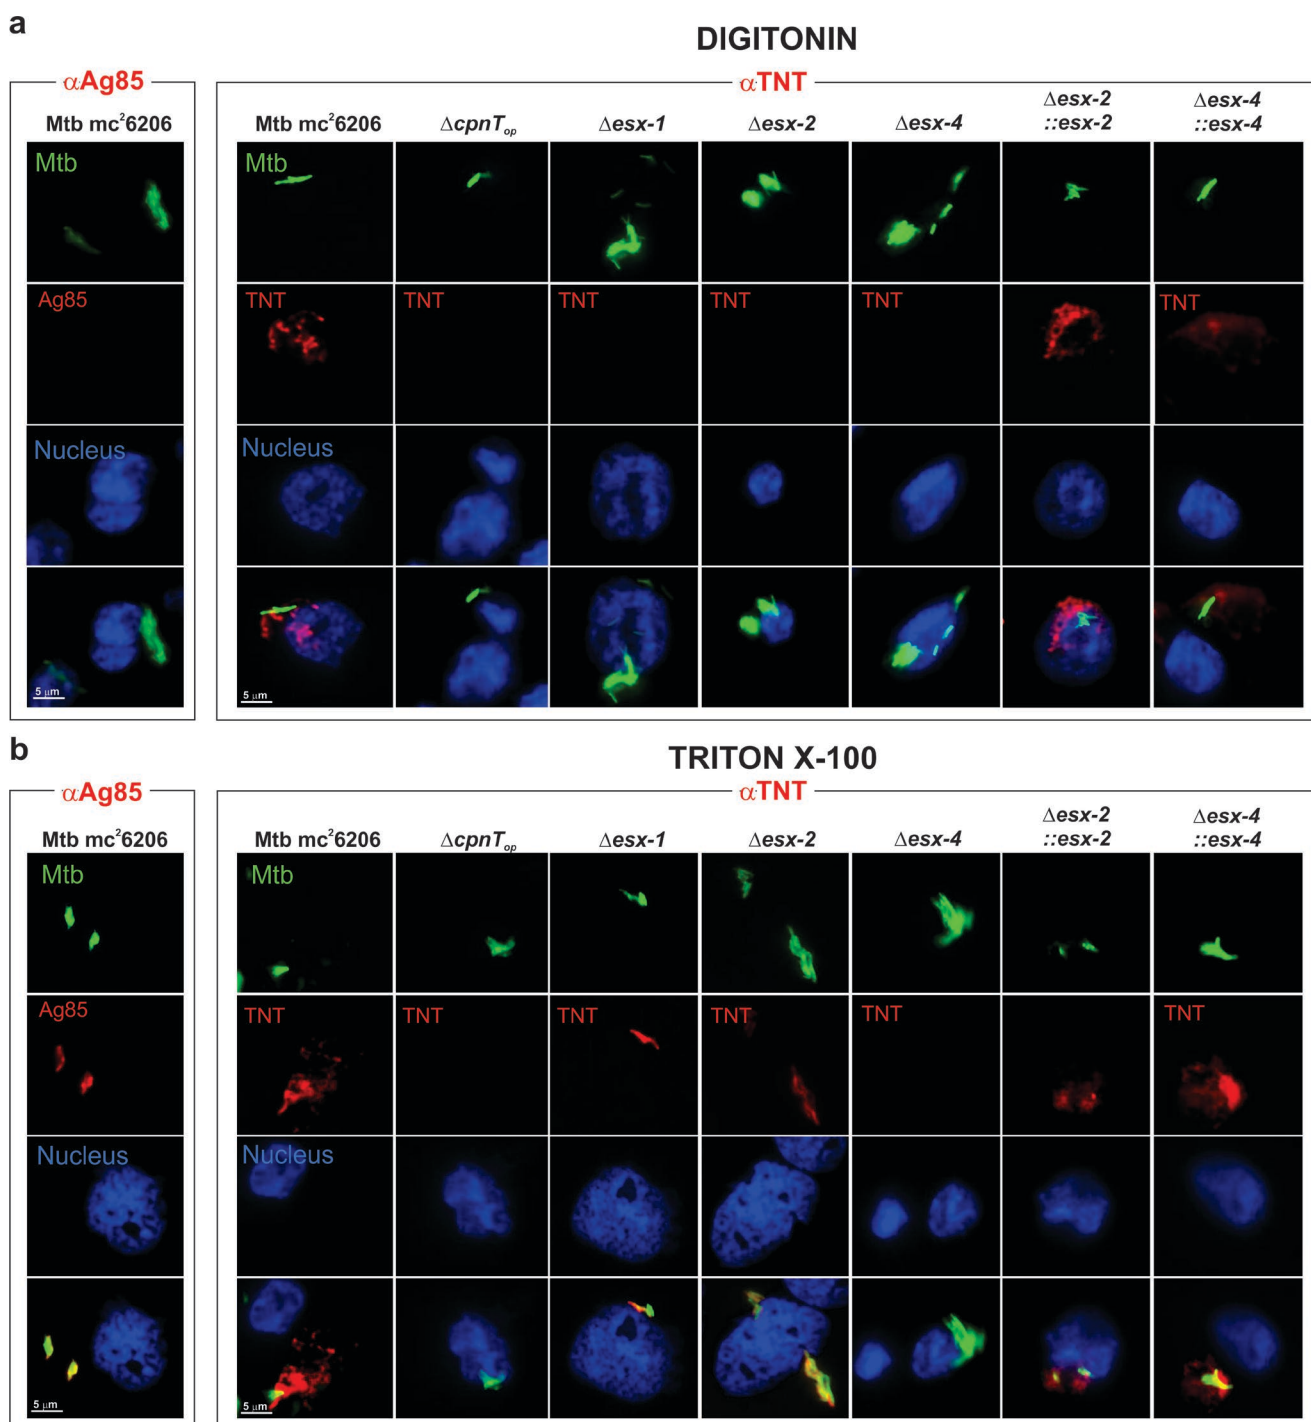

**Supplementary Figure 14. The ESX-1, ESX-2 and ESX-4 systems are required for TNT translocation to the cytosol of macrophages infected with *M. tuberculosis*.**

Full data set for Figure 4a with each fluorescence channel shown separately. Secretion of TNT into the cytosol of Mtb-infected macrophages. The indicated Mtb strains were labelled with DMN-Trehalose (green) and used to infect THP-1 macrophages at a MOI of 10:1. 48 h after infection, the macrophages were permeabilized with digitonin (**a**) to enable access of antibodies to the cytoplasm, or with Triton X-100 (**b**) for access to intracellular compartments. Then, cells were stained with an anti-TNT or anti-Ag85 antibody and with an Alexa Fluor-594 secondary antibody (red). The macrophage nuclei were stained with DAPI. The  $\Delta esx-1$  strain has a deletion of the RD1 region and lacks the *panCD* genes. Shown are representative images from at least two independent experiments ( $n \geq 2$ ).

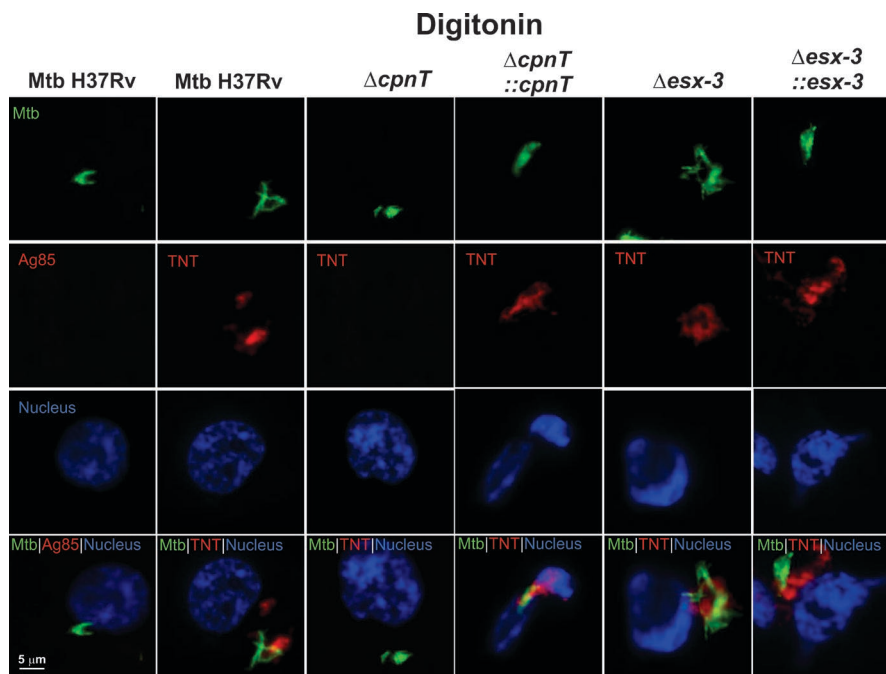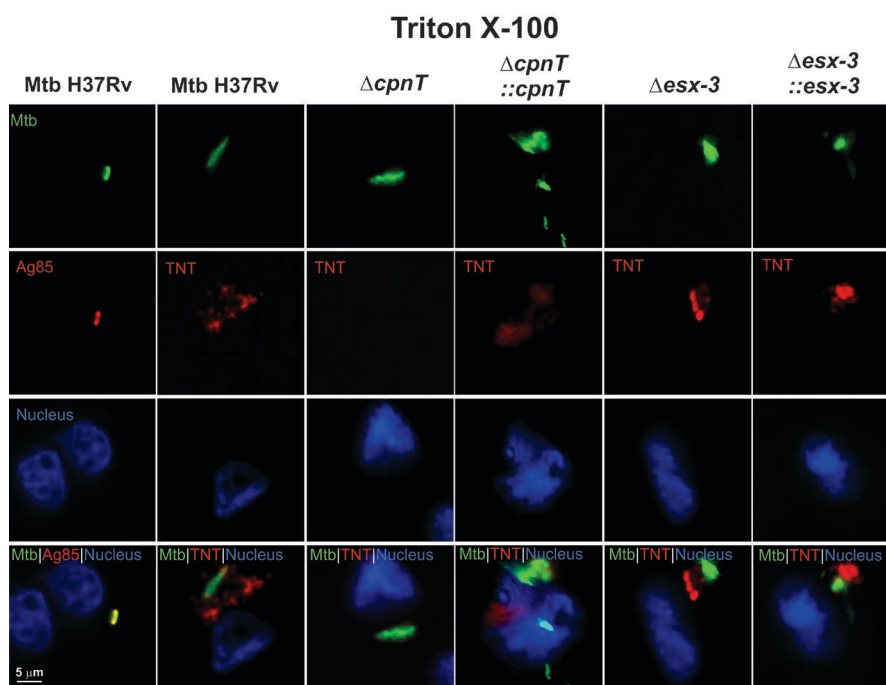

**Supplementary Figure 15. The ESX-3 system is not required for the translocation of CpnT to the cytosol of macrophages infected with *M. tuberculosis*.**

Full data set for Figure 4e with each fluorescence channel shown separately. Secretion of TNT into the cytosol of Mtb-infected macrophages. The indicated Mtb strains were labelled with DMN-Trehalose (green) and used to infect THP-1 macrophages at a MOI of 10:1. 48 h after infection, the macrophages were permeabilized with digitonin to enable access of antibodies to the cytoplasm, or with Triton X-100 for access to intracellular compartments. Then, cells were stained with an anti-TNT or anti-Ag85 antibody and with an Alexa Fluor-594 secondary antibody (red). The macrophage nuclei were stained with DAPI. Shown are representative images from at least two independent experiments ( $n \geq 2$ ).



## Digitonin

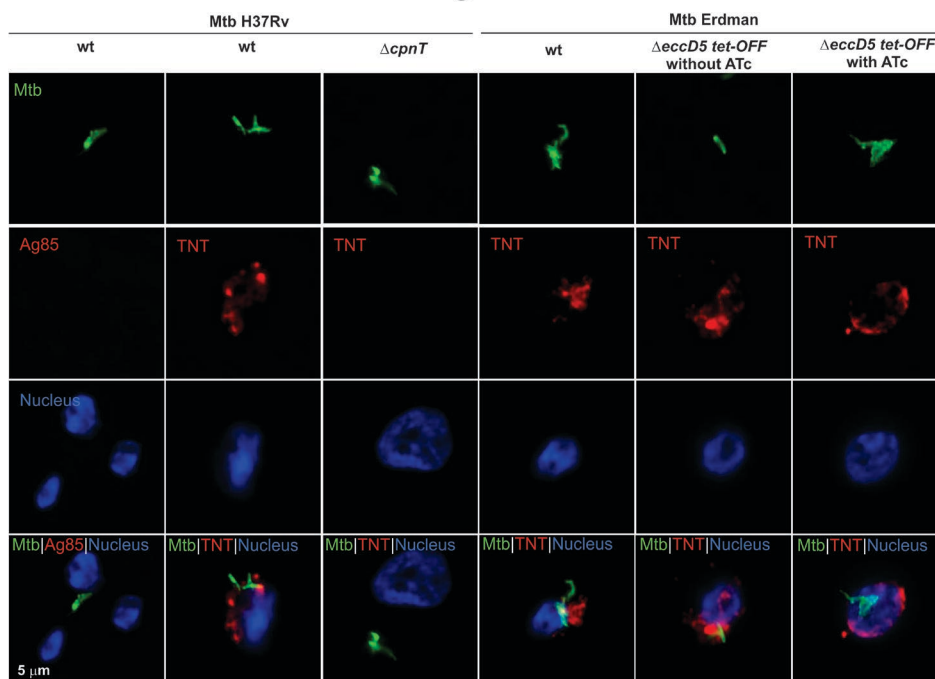

## Triton X-100

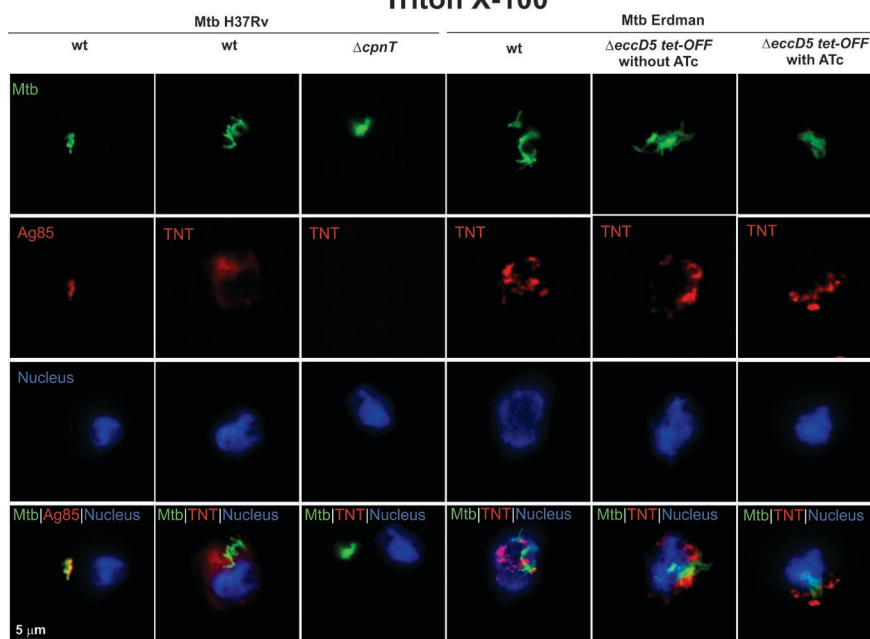

**Supplementary Figure 16. The ESX-5 system is not required for the translocation of CpnT to the cytosol of macrophages infected with *M. tuberculosis*.**

Full data set for Figure 4f with each fluorescence channel shown separately. Secretion of TNT into the cytosol of infected macrophages in the Mtb H37Rv and Erdman backgrounds. When indicated, bacteria were grown in 7H9 + 100 ng/ml anhydrotetracycline (ATc) to pre-deplete EccD5 prior to infection, then ATc was kept in the culture media during the infection. The indicated Mtb strains were labelled with DMN-Trehalose (green) and used to infect THP-1 macrophages at a MOI of 10:1. 48 h after infection, the macrophages were permeabilized with digitonin to enable access of antibodies to the cytoplasm, or with Triton X-100 for access to intracellular compartments. Then, cells were stained with an anti-TNT or anti-Ag85 antibody and with an Alexa Fluor-594 secondary antibody (red). The macrophage nuclei were stained with DAPI. Shown are representative images from at least two independent experiments ( $n \geq 2$ ).

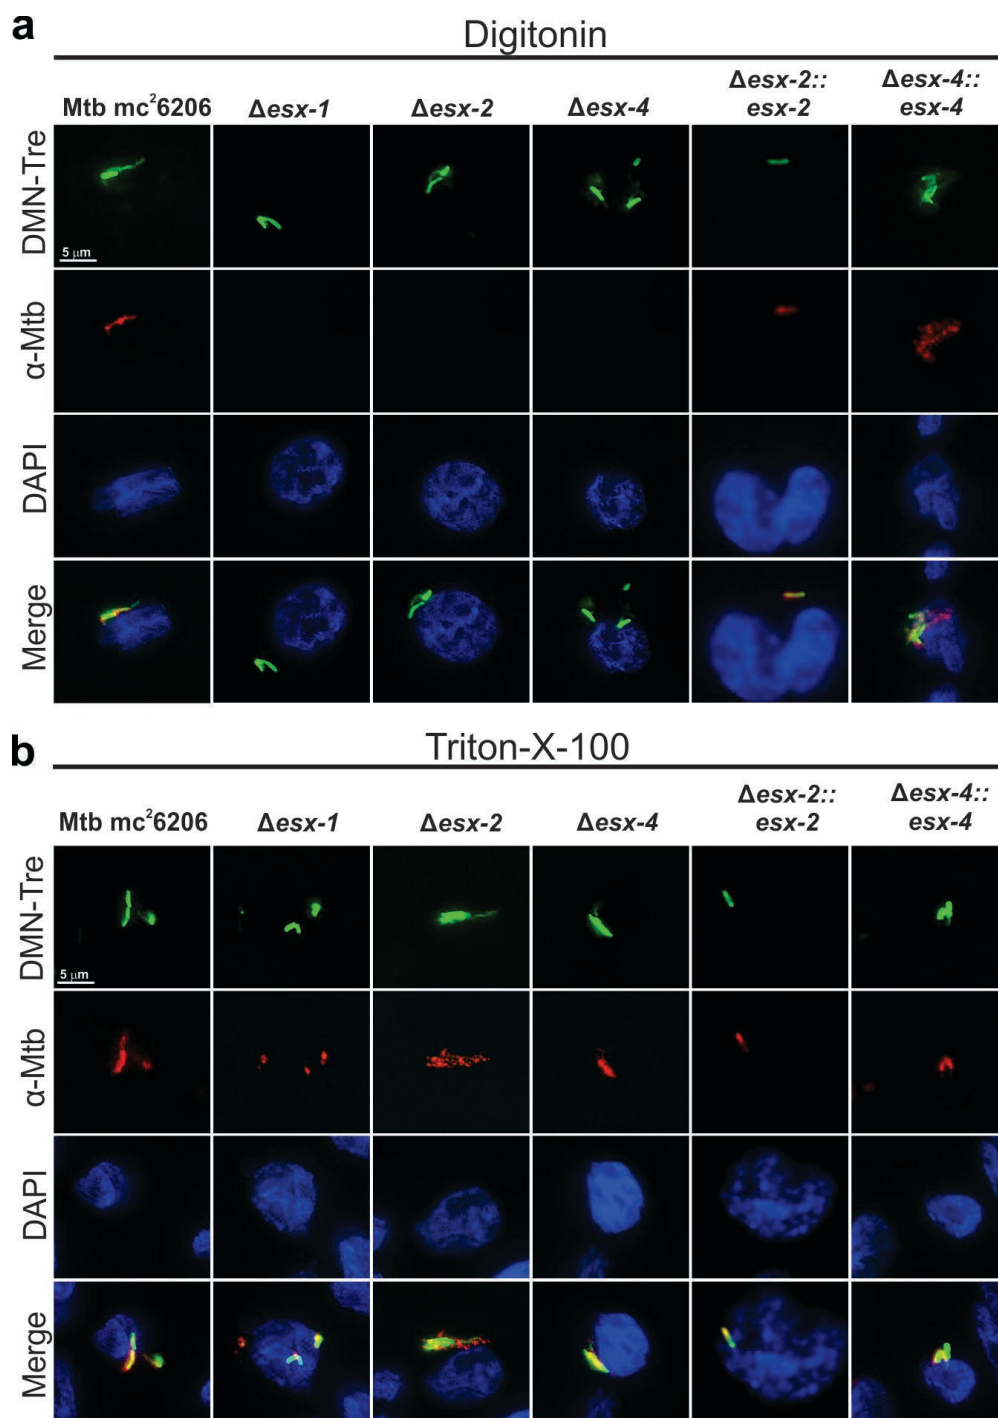

**Supplementary Figure 17. The ESX-1, ESX-2 and ESX-4 systems are required for cytosolic access of *M. tuberculosis*.**

Full data set for Figure 5a with each fluorescence channel shown separately. Immunofluorescent images of THP-1 macrophages infected with DMN-Tre labeled Mtb strains (green) for 48 hours and then stained with an anti-Mtb antibody and Alexa Fluor-594 secondary antibody (red). The macrophages were permeabilized with digitonin (a) to enable access of antibodies to the cytoplasm or with Triton X-100 (b) for access to intracellular compartments. The macrophage nuclei were stained with DAPI. The  $\Delta esx-1$  strain has a deletion of the RD1 region and lacks the *panCD* genes. Shown are representative images from at least two independent experiments ( $n \geq 2$ ).

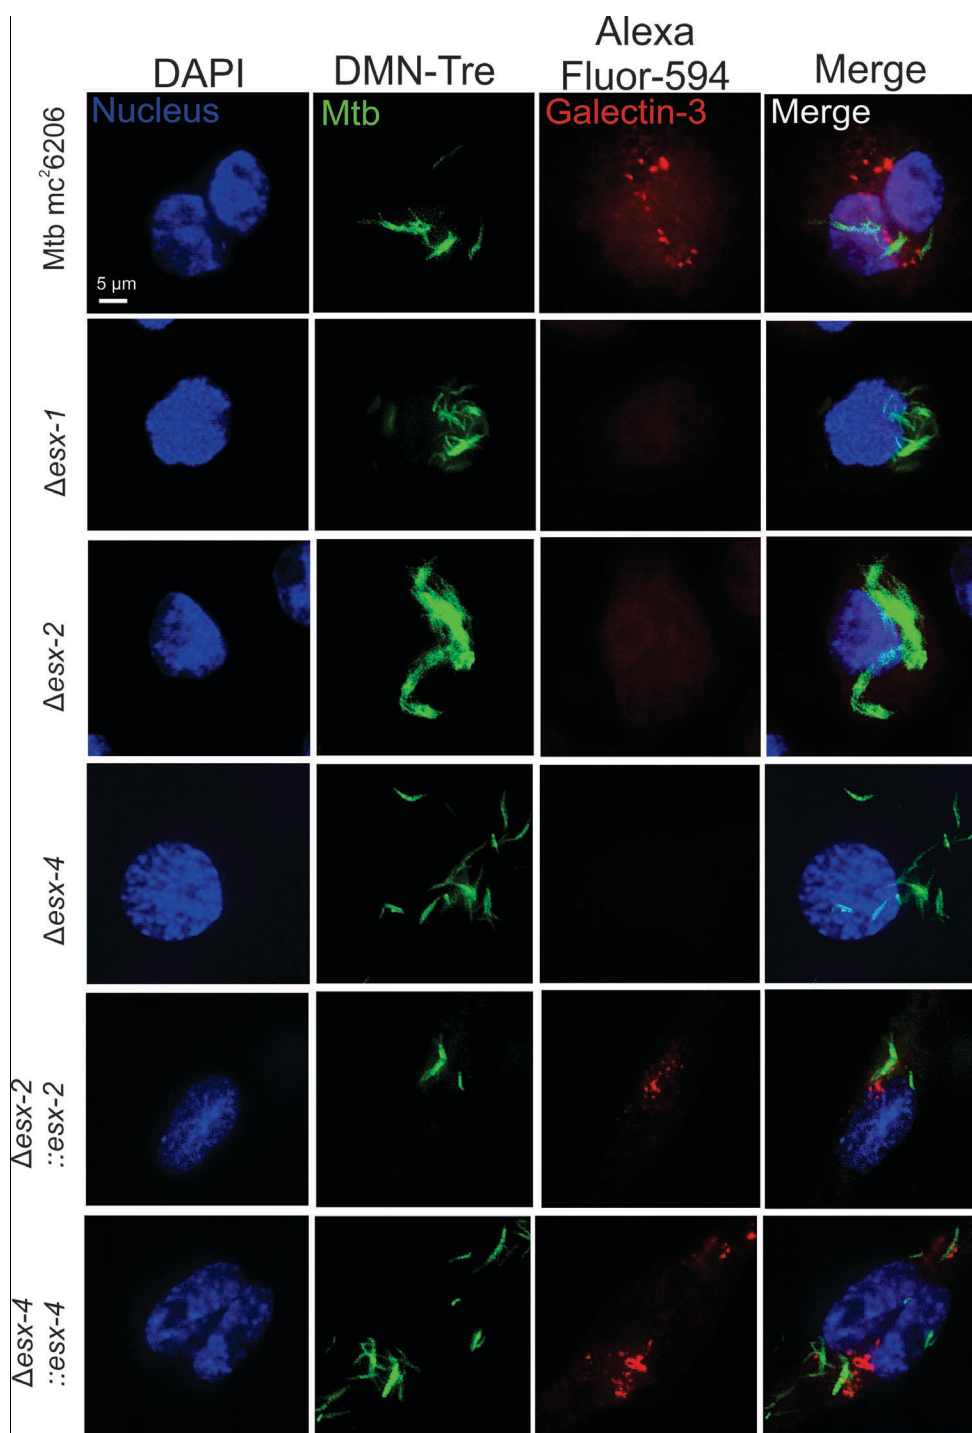

**Supplementary Figure 18. The ESX-1, ESX-2 and ESX-4 systems are required for rupture of the phagosome by *M. tuberculosis*.**

Full data set for Figure 5d with each fluorescence channel shown separately. Immunofluorescent images of THP-1 macrophages infected with DMN-Tre labeled Mtb strains (green) for 48 hours and then stained with an anti-Galectin-3 antibody and Alexa Fluor-594 secondary antibody (red). The macrophages were treated with Triton X-100 to permeabilize all intracellular compartments. The macrophage nuclei were stained with DAPI. The  $\Delta$ esx-1 strain has a deletion of the RD1 region and lacks the *panCD* genes. Shown are representative images from at least two independent experiments (n $\geq$ 2).

## Supplementary Tables

| Strain name                                            | Relevant genotypes and description                                                                                      | Source or Reference |
|--------------------------------------------------------|-------------------------------------------------------------------------------------------------------------------------|---------------------|
| <i>M. tuberculosis</i> mc <sup>2</sup> 6206            | H37Rv derivative; $\Delta leuCD \Delta panCD$ ; avirulent <i>M. tuberculosis</i> (BSL-2)                                | 1                   |
| <i>M. tuberculosis</i> ML2016                          | mc <sup>2</sup> 6206 derivative: $\Delta esxF-esxE-cpnT-ift$ (referred to as $\Delta cpnT$ operon)                      | 2                   |
| <i>M. tuberculosis</i> ML2648                          | ML2016::pML3964                                                                                                         | This study          |
| <i>M. tuberculosis</i> ML2650                          | ML2016::pML3966                                                                                                         | This study          |
| <i>M. tuberculosis</i> ML2651                          | ML2016::pML3967                                                                                                         | This study          |
| <i>M. tuberculosis</i> ML2652                          | ML2016::pML3968                                                                                                         | This study          |
| <i>M. tuberculosis</i> ML2768                          | mc <sup>2</sup> 6206 derivative; $\Delta eccC2$ double crossover strain, marked                                         | This study          |
| <i>M. tuberculosis</i> ML2769                          | mc <sup>2</sup> 6206 derivative; $\Delta eccC4$ double crossover strain, marked                                         | This study          |
| <i>M. tuberculosis</i> ML2691                          | ML2768 derivative; $\Delta eccC2$ ; unmarked                                                                            | This study          |
| <i>M. tuberculosis</i> ML2690                          | ML2769 derivative; $\Delta eccC4$ , unmarked                                                                            | This study          |
| <i>M. tuberculosis</i> ML2692                          | ML2691/cosmid I106 (contains <i>esx-2</i> operon)                                                                       | This study          |
| <i>M. tuberculosis</i> ML2696                          | ML2690/cosmid I60 (contains <i>esx-4</i> operon)                                                                        | This study          |
| <i>M. tuberculosis</i> mc <sup>2</sup> 6230            | $\Delta RD1 \Delta panCD$ ; <i>esx-1</i> deletion mutant                                                                | 3                   |
| <i>M. tuberculosis</i> H37Rv                           | wild-type                                                                                                               | ATCC 25618          |
| <i>M. tuberculosis</i> ML845                           | H37Rv derivative; $\Delta cpnT$ , unmarked                                                                              | 4                   |
| <i>M. tuberculosis</i> ML2001                          | ML845::pML3009                                                                                                          | 4                   |
| <i>M. tuberculosis</i> mc <sup>2</sup> 7788            | H37Rv derivative; <i>esx-3</i> operon deletion mutant                                                                   | 5                   |
| <i>M. tuberculosis</i> mc <sup>2</sup> 7827            | mc <sup>2</sup> 7788 derivative; <i>esx-3</i> operon deletion mutant complemented with <i>esx-3</i> cosmid at attB site | 5                   |
| <i>M. tuberculosis</i> Erdman                          | wild-type                                                                                                               | ATCC® 35801™        |
| <i>M. tuberculosis</i> <i>eccD<sub>5</sub></i> Tet-OFF | Mtb Erdman derivative; <i>eccD<sub>5</sub></i> conditional mutant                                                       | 6                   |
| <i>E. coli</i> MachI                                   | <i>lacZ</i> $\Delta$ M15, <i>hsdR</i> , <i>lacX74</i> , <i>recA</i> , <i>endA</i> , <i>tonA</i>                         | Invitrogen          |

**Supplementary Table 1. Strains used in this study**

| Plasmid     | Properties                                                                                                                                                                                                                               | Reference  |
|-------------|------------------------------------------------------------------------------------------------------------------------------------------------------------------------------------------------------------------------------------------|------------|
| pML3009     | PBR322 origin, <i>aph</i> , L5 attP, FRT-int-Pimyc-esxF-esxEcpnT-rv3902c-FRT                                                                                                                                                             | 4          |
| pML3042     | <i>aph</i> , <i>int<sub>L5</sub></i> , <i>attP<sub>L5</sub></i> , psmyc-esxF-esxE-cpnT <sub>HA-ift</sub> ; kan <sup>R</sup> ; integrative expression vector for the HA-marked <i>cpnT</i> operon                                         | This study |
| pML3964     | pML3042-derivative: <i>attP<sub>L5</sub></i> , psmyc-esxF-esxE-cpnT-ift; kan <sup>R</sup> , integrative expression vector for the HA-marked <i>cpnT</i> operon                                                                           | This study |
| pML3966     | pML3964-derivative: <i>attP<sub>L5</sub></i> , psmyc-esxF-esxE-cpnT <sub>Y88A-ift</sub> ; kan <sup>R</sup> , integrative <i>cpnT</i> -operon expression vector with mutation of ESX motif 1 (Y1*)                                        | This study |
| pML3967     | pML3964-derivative: <i>attP<sub>L5</sub></i> , psmyc-esxF-esxE-cpnT <sub>Y741A-ift</sub> ; kan <sup>R</sup> , integrative <i>cpnT</i> -operon expression vector with mutation of ESX motif 2 (Y2*)                                       | This study |
| pML3968     | pML3964-derivative: <i>attP<sub>L5</sub></i> , psmyc-esxF-esxE-cpnT <sub>-Y756A-ift</sub> ; kan <sup>R</sup> , integrative <i>cpnT</i> -operon expression vector with mutation of ESX motif 3 (Y3*)                                      | This study |
| pML2424     | pUC origin, pAL5000ts, <i>loxP</i> -psmyc- <i>gfp<sub>m</sub><sup>2+</sup></i> - <i>hyg</i> - <i>loxP</i> , psmyc- <i>sacR</i> - <i>sacB</i> ; hyg <sup>R</sup> , vector for gene deletion in mycobacteria via homologous recombination  | 7          |
| pML4245     | pML2424-derivative; hom <sub>up</sub> - <i>eccC2</i> - hom <sub>down</sub> ; hyg <sup>R</sup> , <i>eccC2</i> deletion vector                                                                                                             | This study |
| pML4255     | pML2424-derivative; hom <sub>up</sub> - <i>eccC4</i> - hom <sub>down</sub> ; hyg <sup>R</sup> , <i>eccC4</i> deletion vector                                                                                                             | This study |
| pML2714     | pUC origin; pAL5000ts; <i>P<sub>hsp60</sub>::cre</i> ; <i>P<sub>imyc</sub>::pamcherry1m</i> ; <i>aph</i> ; 7613 bp                                                                                                                       | 8          |
| Cosmid I106 | pYUB412 cosmid, <i>bla</i> , <i>hyg</i> , <i>int<sub>L5</sub></i> , <i>attB<sub>L5</sub></i> ; hyg <sup>R</sup> . coordinates of the integrated H37Rv DNA: ~4349-4385 kb contains the <b>esx-2 locus</b> of <i>M. tuberculosis</i> H37Rv | 9          |
| Cosmid I60  | pYUB412 cosmid, <i>bla</i> , <i>hyg</i> , <i>int<sub>L5</sub></i> , <i>attB<sub>L5</sub></i> ; hyg <sup>R</sup> . coordinates of the integrated H37Rv DNA: ~3848-3874 kb contains the <b>esx-4 locus</b> of <i>M. tuberculosis</i> H37Rv | 9          |

### Supplementary Table 2. Plasmids and cosmids used in this study

“Origin” means origin of replication. pAL5000ts denotes the temperature-sensitive origin of replication<sup>10</sup> of the pAL5000 plasmid<sup>11</sup>. The *bla*, *hyg* and *aph* genes confer resistance to ampicillin, hygromycin and kanamycin, respectively. The *attP<sub>L5</sub>* site is required for site specific integration of plasmids into the chromosomal *attB* site by the mycobacteriophage L5 integrase gene, *int<sub>L5</sub>*. The site-specific recombinase Cre excises DNA fragments flanked by *loxP* sites. The constitutive mycobacterial promoters p<sub>smyc</sub> and p<sub>imyc</sub> have been described previously<sup>12,13</sup>. We cloned app. 1000 bp of homologous up- and downstream sequences to flank the *loxP*-psmyc-*gfp<sub>m</sub><sup>2+</sup>*-*hyg*-*loxP* cassette of pML2424 for the construction of the *eccC2* and *eccC4* deletion vectors pML4245 and pML4255. Upstream and downstream sequences were cloned using SpeI/SwaI and PacI/NsiI, respectively.

| Oligonucleotide   | Sequence                                                        |
|-------------------|-----------------------------------------------------------------|
| EsxF-Pacl-FWD     | ATATTTAATTAACAGAAAGGAGGATTTCAACTATCATGGGTGCCGACGACACGC          |
| IFT-Rev-HindIII   | GCAAGCTTTAACCCCTTATAGTCCTTCCAAA                                 |
| CpnT M1 Y88A Fwd  | AGCGCGCACAAACGCCTCGTTG                                          |
| CpnT M1 Y88A Rev  | CAACGAGGCGTTGTGCGCGCT                                           |
| CpnT M2 Y356A Fwd | TTCGGGTGGGCCCGCTCCTGG                                           |
| CpnT M2 Y356A Rev | CCAGGAGCGGGCCCACCCGAA                                           |
| CpnT M3 Y741A Fwd | AGGATCGCCGCCACTAATCTC                                           |
| CpnT M3 Y741A Rev | GAGATTAGTGGCGGCGATCCT                                           |
| eccC2-DN-Nsi-r    | ATTATATATGCATCGAGAACCCCTCCGTAGGTG                               |
| eccC2-inner-f     | AGGCGCAGCTCACGCTGATCGAC                                         |
| EccC2-UP-SPE-f    | ATATAGACTAGTGAGATCGCCAAGTATCCGAC                                |
| EccC2-UP-Swa-r    | CTCTCAATTTAAATGGAAACGCTTTCTTGGACAT                              |
| EccC4-DN-nsil-Rev | AGAGATATGCATGTGATTGTGTGACGTGCAAC                                |
| EccC4-HindIII-Rev | GCAGAATTCGAAGCTTCTACTGCTCGCCGGGCACCGACGG                        |
| EccC4-inn-f       | TCGACGTCATCGAGTCGGAACA                                          |
| EccC4-Inner-Fwd   | GCACACGCGACCATTGCGGATGCGCCCATCGCGATCCCCTTGCGGGTCCG              |
| EccC4-Inner-Rev   | ACATGTACGCCGAATGAAAGCCCTTGAGCTGCCAGGGCAACGATCGACTCC<br>TCAAGGGC |
| EccC4-UP-Spe-F    | AGAGATACTAGTCGGATACCTCTAACAGACCA                                |
| EccC4-UP-Swa-r    | CTCTCAATTTAAATGCTTGTGGACAACCGAATAC                              |

**Supplementary Table 3. Oligonucleotides used in this study**

| <b>Antibody</b>                                           | <b>Source</b>                              |
|-----------------------------------------------------------|--------------------------------------------|
| Rabbit polyclonal anti-TNT                                | Generated by external vendor <sup>4</sup>  |
| Rabbit polyclonal anti-IFT                                | Generated by external vendor <sup>14</sup> |
| Rabbit polyclonal anti-EsxF                               | Generated by external vendor <sup>2</sup>  |
| Rabbit polyclonal anti- <i>Mycobacterium tuberculosis</i> | Commercial - Ab905, Abcam:                 |
| Mouse monoclonal anti-LpqH (clone IT-54)                  | Commercial - NR-13792; BEI Resources       |
| Rabbit polyclonal anti-Antigen-85 complex                 | Commercial - NR-13800; BEI Resources       |
| Rabbit polyclonal anti-CFP-10                             | Commercial - NR-13801; BEI Resources       |
| Mouse monoclonal anti-Mctb (clone 5D1.23)                 | Generated by external vendor <sup>15</sup> |
| Rabbit polyclonal anti-Glpx                               | Generated by external vendor <sup>2</sup>  |
| Rabbit polyclonal anti-PPE41                              | Generated by external vendor <sup>6</sup>  |
| Rabbit polyclonal anti-EccD <sub>5</sub>                  | Generated by external vendor <sup>6</sup>  |
| Mouse monoclonal anti-Galectin-3 (clone A3A12)            | Commercial - Ab2785, Abcam                 |
| Donkey anti-rabbit IgG (H+L)-Alexa Fluor-594 secondary    | Commercial - A-21207, Thermo Fisher        |
| Donkey anti-rabbit IgG (H+L)-Alexa Fluor-488              | Commercial - A-21206, Thermo Fisher        |
| IRDye 680RD Donkey anti-rabbit IgG secondary              | Commercial - 926-68073, LI-COR             |
| IRDye 800CW Goat anti-mouse IgG Secondary                 | Commercial - 926-332210, LI-COR            |

**Supplementary Table 4. Antibodies used in this study**

## Uncropped scans of blots shown in figures

### Supplementary Figure 3

Immunoblots:

Subcellular fractionation of Mtb mc<sup>2</sup>6206 and derivative strains, showing the membrane and soluble fractions.

1. mc<sup>2</sup>6206  $\Delta$ esxFE-cpnT-ift + esxFE-cpnT-ift (membrane fraction)
2. mc<sup>2</sup>6206  $\Delta$ esxFE-cpnT-ift + esxFE-cpnT-ift (soluble fraction)
3. mc<sup>2</sup>6206  $\Delta$ esxFE-cpnT-ift (membrane fraction)
4. mc<sup>2</sup>6206  $\Delta$ esxFE-cpnT-ift (soluble fraction)
5. mc<sup>2</sup>6206  $\Delta$ esxFE-cpnT-ift + esxFE-cpnT-Y1\*-ift (membrane fraction)
6. mc<sup>2</sup>6206  $\Delta$ esxFE-cpnT-ift + esxFE-cpnT-Y1\*-ift (soluble fraction)
7. mc<sup>2</sup>6206  $\Delta$ esxFE-cpnT-ift + esxFE-cpnT-Y2\*-ift (membrane fraction)
8. mc<sup>2</sup>6206  $\Delta$ esxFE-cpnT-ift + esxFE-cpnT-Y2\*-ift (soluble fraction)
9. mc<sup>2</sup>6206  $\Delta$ esxFE-cpnT-ift + esxFE-cpnT-Y3\*-ift (membrane fraction)
10. mc<sup>2</sup>6206  $\Delta$ esxFE-cpnT-ift + esxFE-cpnT-Y3\*-ift (soluble fraction)

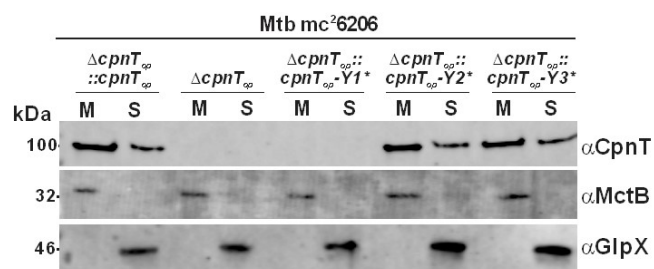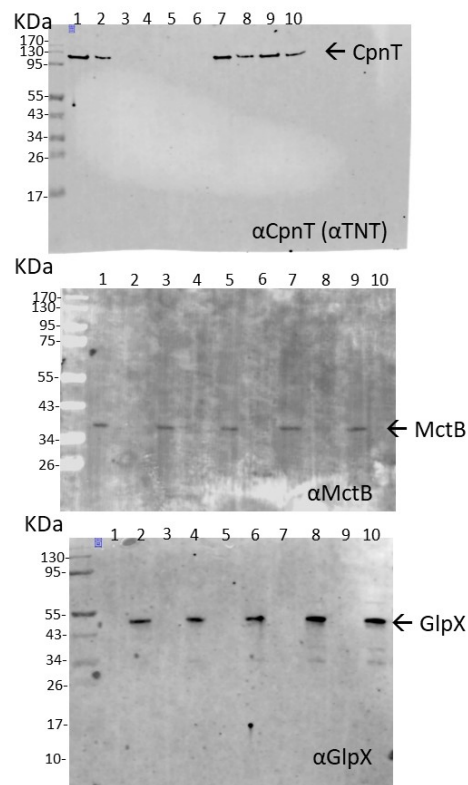



### Supplementary Figure 8

Immunoblots:

Whole cell lysates (CL) and culture filtrates (CF) of Mtb mc<sup>2</sup>6206 and derivative strains

1. mc<sup>2</sup>6206 (whole cell lysate)
2. mc<sup>2</sup>6206 (culture filtrate)
3. mc<sup>2</sup>6206 Δ*esx-1* (whole cell lysate)
4. mc<sup>2</sup>6206 Δ*esx-1* (culture filtrate)
5. mc<sup>2</sup>6206 Δ*esx-2* (whole cell lysate)
6. mc<sup>2</sup>6206 Δ*esx-2* (culture filtrate)
7. mc<sup>2</sup>6206 Δ*esx-4* (whole cell lysate)
8. mc<sup>2</sup>6206 Δ*esx-4* (culture filtrate)
9. mc<sup>2</sup>6206 Δ*esx-2::esx-2* (whole cell lysate)
10. mc<sup>2</sup>6206 Δ*esx-2::esx-2* (culture filtrate)
11. mc<sup>2</sup>6206 Δ*esx-4::esx-4* (whole cell lysate)
12. mc<sup>2</sup>6206 Δ*esx-4::esx-4* (culture filtrate)

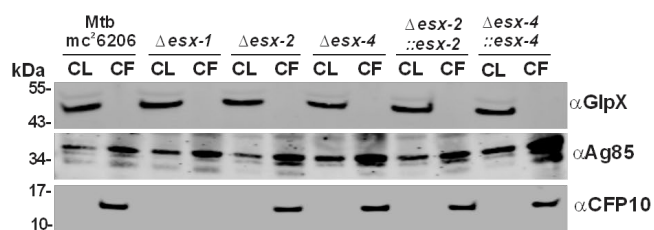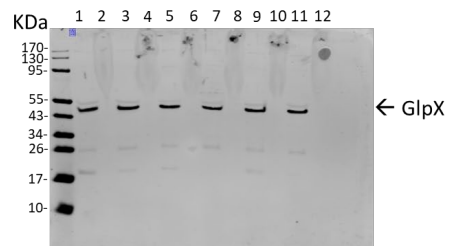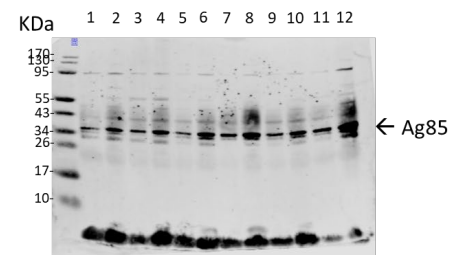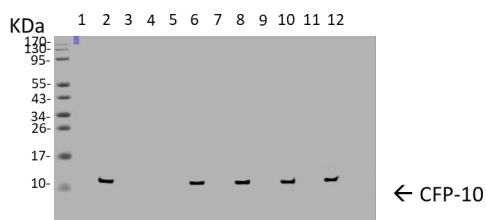

### Supplementary Figure 10

Immunoblots:

Subcellular fractionation of Mtb mc<sup>2</sup>6206 and derivative strains, showing the membrane and soluble fractions.

1. mc<sup>2</sup>6206 (membrane fraction)
2. mc<sup>2</sup>6206 (soluble fraction)
3. mc<sup>2</sup>6206  $\Delta$ esxFE-cpnT-ift (membrane fraction)
4. mc<sup>2</sup>6206  $\Delta$ esxFE-cpnT-ift (soluble fraction)
5. mc<sup>2</sup>6206  $\Delta$ esx-1 (membrane fraction)
6. mc<sup>2</sup>6206  $\Delta$ esx-1 (soluble fraction)
7. mc<sup>2</sup>6206  $\Delta$ esx-2 (membrane fraction)
8. mc<sup>2</sup>6206  $\Delta$ esx-2 (soluble fraction)
9. mc<sup>2</sup>6206  $\Delta$ esxG (membrane fraction)
10. mc<sup>2</sup>6206  $\Delta$ esxG (soluble fraction)
11. mc<sup>2</sup>6206  $\Delta$ esx-4 (membrane fraction)
12. mc<sup>2</sup>6206  $\Delta$ esx-4 (soluble fraction)
13. mc<sup>2</sup>6206  $\Delta$ esx-4::esx-4 (membrane fraction)
14. mc<sup>2</sup>6206  $\Delta$ esx-4::esx-4 (soluble fraction)

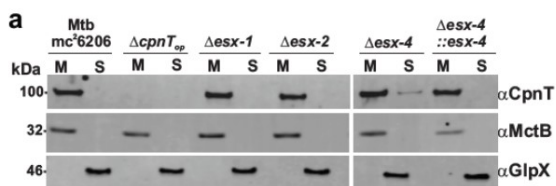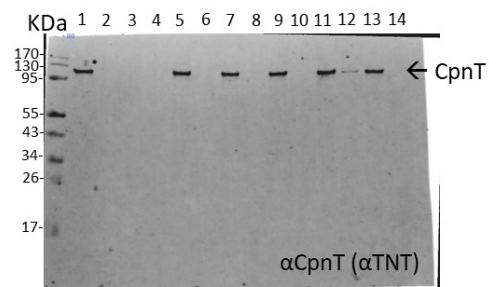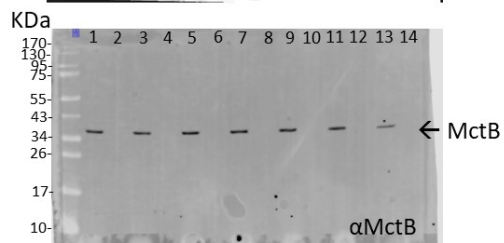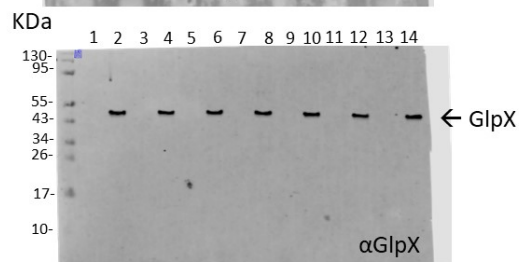

## Supplementary References

- 1 Sampson, S. L. *et al.* Protection elicited by a double leucine and pantothenate auxotroph of *Mycobacterium tuberculosis* in guinea pigs. *Infect Immun* **72**, 3031-3037, (2004).
- 2 Tak, U., Dokland, T. & Niederweis, M. Pore-forming Esx proteins mediate toxin secretion by *Mycobacterium tuberculosis*. *Nat Commun* **12**, 394, (2021).
- 3 Sambandamurthy, V. K. *et al.* *Mycobacterium tuberculosis*  $\Delta RD1 \Delta panCD$ : a safe and limited replicating mutant strain that protects immunocompetent and immunocompromised mice against experimental tuberculosis. *Vaccine* **24**, 6309-6320, (2006).
- 4 Danilchanka, O. *et al.* An outer membrane channel protein of *Mycobacterium tuberculosis* with exotoxin activity. *Proc Natl Acad Sci U S A* **111**, 6750-6755, (2014).
- 5 Tufariello, J. M. *et al.* Separable roles for *Mycobacterium tuberculosis* ESX-3 effectors in iron acquisition and virulence. *Proc Natl Acad Sci U S A* **113**, E348-357, (2016).
- 6 White, D. W., Elliott, S. R., Odean, E., Bemis, L. T. & Tischler, A. D. *Mycobacterium tuberculosis* Pst/SenX3-RegX3 Regulates Membrane Vesicle Production Independently of ESX-5 Activity. *MBio* **9**, e00778, (2018).
- 7 Mitra, A., Speer, A., Lin, K., Ehrt, S. & Niederweis, M. PPE surface proteins are required for heme utilization by *Mycobacterium tuberculosis*. *MBio* **8**, e01720, (2017).
- 8 Ofer, N. *et al.* Ectoine biosynthesis in *Mycobacterium smegmatis*. *Appl Environ Microbiol* **78**, 7483-7486, (2012).
- 9 Philipp, W. J. *et al.* An integrated map of the genome of the tubercle bacillus, *Mycobacterium tuberculosis* H37Rv, and comparison with *Mycobacterium leprae*. *Proc Natl Acad Sci U S A* **93**, 3132-3137, (1996).
- 10 Guilhot, C., Gicquel, B. & Martin, C. Temperature-sensitive mutants of the *Mycobacterium* plasmid pAL5000. *FEMS Microbiol Lett* **77**, 181-186, (1992).
- 11 Labidi, A., David, H. L. & Roulland-Dussoix, D. Restriction endonuclease mapping and cloning of *Mycobacterium fortuitum* var. *fortuitum* plasmid pAL5000. *Ann Inst Pasteur Microbiol* **136B**, 209-215, (1985).
- 12 Kaps, I. *et al.* Energy transfer between fluorescent proteins using a co-expression system in *Mycobacterium smegmatis*. *Gene* **278**, 115-124, (2001).
- 13 Mailaender, C. *et al.* The MspA porin promotes growth and increases antibiotic susceptibility of both *Mycobacterium bovis* BCG and *Mycobacterium tuberculosis*. *Microbiology* **150**, 853-864, (2004).
- 14 Sun, J. *et al.* The tuberculosis necrotizing toxin kills macrophages by hydrolyzing NAD. *Nat Struct Mol Biol* **22**, 672-678, (2015).
- 15 Wolschendorf, F. *et al.* Copper resistance is essential for virulence of *Mycobacterium tuberculosis*. *Proc Natl Acad Sci U S A* **108**, 1621-1626, (2011).
